# Supplementary material for: Spectrometric and computational studies of the binding of HIV-1 integrase inhibitors to viral DNA extremities
Source: PeerJ journal article supplement (doi:10.7717/peerj-pchem.6), 2019-12-02
Supplement: LTR32DTG085.xls [file LTR32DTG085.xls]

## Sheet: 32FDT085
BLANK:4	5	0.0182726	84.88	1015.2	1.93713
BLANK:6	5	0.0262352	63.2365	1120	3.36324
BLANK:7	5	0.0143585	59.7857	1185.4	2.83687
BLANK:10	5	0.0286603	38.0712	1286.2	2.99825
BLANK:12	5	0.0221885	52.6139	1272.2	1.16254
BLANK:13	5	0.0229684	48.3953	1250	2.88067
BLANK:14	5	0.0321791	43.9253	1370.6	3.24775
BLANK:17	5	0.0284268	82.4205	1331.6	2.16062
BLANK:22	5	0.0174641	82.0248	1359	1.82911
BLANK:23	5	0.029785	29.9661	1467.2	2.65326
ltr32fm8nM:1	5	0.0883048	29.6587	1217.6	4.40989
ltr32fm8nM:3	5	0.083028	2.3993	1324.8	1.68735
ltr32fm8nM:4	5	0.0938513	13.2018	1324.8	2.07503
ltr32fm8nM:8	5	0.0853511	11.788	1398	2.05324
ltr32fm8nM:10	5	0.0954581	19.2374	1334.2	2.11246
ltr32fm8nM:14	5	0.0905823	17.9229	1234	2.29629
ltr32fm8nM:15	5	0.0830677	17.9469	1398	2.2776
ltr32fm8nM:17	5	0.0889456	14.2295	1343.8	4.2735
BLANK:2	5	0.0233452	2.19422	1545	2.72122
dtg6.24e-13:2	5	0.0787303	32.2308	1034.2	9.08665
dtg6.24e-13:8	5	0.0799504	32.9445	1291.8	1.4161
dtg6.24e-13:9	5	0.083653	30.0939	1410.6	3.27276
dtg6.24e-13:10	5	0.0973752	7.47827	1189.2	2.00258
dtg6.24e-13:11	5	0.090884	21.2659	1422.6	3.48579
dtg6.24e-13:12	5	0.081752	25.4042	1362	3.38759
dtg6.24e-13:13	5	0.0811205	29.7766	1333.6	4.33389
dtg6.24e-13:17	5	0.0931368	22.9144	1399	2.11089
BLANK:1	5	0.0360803	25.3305	1716.8	1.95321
dtg1.24e-12:4	5	0.0788943	17.0767	1230.8	2.71234
dtg1.24e-12:5	5	0.0824005	20.8275	1238.8	2.90128
dtg1.24e-12:6	5	0.0800636	22.63	1239.8	5.88134
dtg1.24e-12:11	5	0.0796122	12.4465	1331.4	3.04274
dtg1.24e-12:13	5	0.084051	27.2191	1263.2	1.74395
dtg1.24e-12:16	5	0.099377	22.0067	1328.4	4.70249
dtg1.24e-12:17	5	0.0781108	27.6604	1349	5.03157
dtg1.24e-12:18	5	0.0919214	12.9094	1278.6	2.14283
BLANK:2	5	0.0292437	35.7995	1893.6	2.32041
dtg2.5e-12:1	5	0.0754627	38.2779	1239.4	3.70454
dtg2.5e-12:3	5	0.0710485	24.9857	1154.6	3.08342
dtg2.5e-12:4	5	0.0787095	16.9487	1209.8	3.87566
dtg2.5e-12:6	5	0.0893151	19.2405	1286.6	3.74663
dtg2.5e-12:8	5	0.0828532	19.8803	1145.2	4.09575
dtg2.5e-12:9	5	0.0826774	38.0361	1121.4	1.32807
dtg2.5e-12:10	5	0.074514	21.1942	1232	2.26759
dtg2.5e-12:11	5	0.0992324	21.4611	1180.2	3.022
BLANK:1	5	0.0374088	17.7738	2045.4	1.80494
dtg5e-12:5	5	0.0735775	17.3689	999.4	2.53813
dtg5e-12:6	5	0.0786435	11.9529	996.2	2.65254
dtg5e-12:7	5	0.0833667	24.1358	973	1.69986
dtg5e-12:8	5	0.089421	15.5241	976.8	2.08136
dtg5e-12:11	5	0.0715911	27.2284	1030.2	0.976781
dtg5e-12:14	5	0.0886514	22.7672	1022.6	2.64955
dtg5e-12:16	5	0.0836439	23.205	1018.4	3.42867
dtg5e-12:17	5	0.077061	19.1901	983.4	2.54106
BLANK:1	5	0.033452	30.8794	1905	0.928555
dtg7.09e-12:5	5	0.0825856	10.4863	1201.4	3.05519
dtg7.09e-12:6	5	0.0815857	18.9617	1230.6	3.0836
dtg7.09e-12:8	5	0.103966	28.0094	1151.6	4.29662
dtg7.09e-12:9	5	0.0929468	14.1188	1198.6	2.69141
dtg7.09e-12:10	5	0.0900322	37.7686	1258	3.21552
dtg7.09e-12:13	5	0.0785576	18.3133	1216.6	2.4481
dtg7.09e-12:14	5	0.0756797	33.6714	1226	1.84815
dtg7.09e-12:15	5	0.0774312	24.9899	1200.8	2.76118
BLANK:2	5	0.047565	15.7294	1956.6	1.26866
dtg1.32e-11:12	5	0.0858094	20.9115	1443.6	6.51078
dtg1.32e-11:18	5	0.0848845	23.3661	1116.2	4.09704
BLANK:1	5	0.0339511	18.5498	1930.6	1.98355
dtg5.65e-11:1	5	0.0663254	38.6371	1122.4	2.35318
dtg5.65e-11:2	5	0.0623346	33.1266	1065.2	1.32413
dtg5.65e-11:3	5	0.089812	21.0258	1127.6	2.57938
dtg5.65e-11:5	5	0.0676584	21.1921	1044.6	3.13163
dtg5.65e-11:6	5	0.0799212	21.1161	1109.6	3.7183
dtg5.65e-11:7	5	0.074517	29.7509	1141.6	2.93303
dtg5.65e-11:8	5	0.0684632	15.5003	1130.4	2.36185
dtg5.65e-11:9	5	0.0722137	19.4451	1110.4	1.87549
BLANK:2	5	0.0324096	14.6691	1832.4	1.63689
dtg1.05e-10:1	5	0.0680734	11.6568	1138.2	1.38096
dtg1.05e-10:2	5	0.0505635	39.2799	1169.6	1.37146
dtg1.05e-10:4	5	0.0724106	9.63816	1173.2	2.70439
dtg1.05e-10:5	5	0.0779547	35.7083	1151	0.871672
dtg1.05e-10:6	5	0.0702973	24.5142	1183.2	2.56861
dtg1.05e-10:7	5	0.0681329	26.0172	1222.8	3.62998
dtg1.05e-10:8	5	0.0673763	16.9763	1162.4	3.13745
dtg1.05e-10:9	5	0.0573409	43.7543	1232.2	1.86404
BLANK:2	5	0.0382629	33.6498	1841.6	0.645378
dtg5.35e-10:2	5	0.0621208	26.9974	1267.6	3.74482
dtg5.35e-10:3	5	0.0557992	16.8841	1264	0.6877
dtg5.35e-10:5	5	0.0677058	21.2262	1174.6	2.67377
dtg5.35e-10:6	5	0.0855135	23.1404	1246.2	1.57397
dtg5.35e-10:7	5	0.0663351	19.7544	1187.4	1.7893
dtg5.35e-10:8	5	0.0611999	19.3993	1229.2	2.8387
dtg5.35e-10:9	5	0.0872651	16.0784	1212.8	2.1251
dtg5.35e-10:10	5	0.0752287	19.4999	1237	2.96759
BLANK:1	5	0.0279508	21.5499	1876	1.16955
dtg1.03e-9:3	5	0.0715536	23.8888	1193.2	3.0954
dtg1.03e-9:4	5	0.0919599	19.2655	1312.4	2.41322
dtg1.03e-9:5	5	0.0728278	16.2091	1224.8	2.97973
dtg1.03e-9:6	5	0.102676	12.1275	1205.4	2.02728
dtg1.03e-9:7	5	0.106304	20.6239	1156.2	4.13514
dtg1.03e-9:8	5	0.100479	18.0351	1253	2.75495
dtg1.03e-9:10	5	0.0981046	6.66984	1139.2	2.96453
dtg1.03e-9:11	5	0.0855	8.00138	1225.8	2.14251
BLANK:1	5	0.0333869	6.49084	1886.4	1.14123
dtg5.1e-9:1	5	0.0866688	7.81318	1146.4	3.43948
dtg5.1e-9:2	5	0.0803458	15.9511	1155.2	2.4154
dtg5.1e-9:3	5	0.0723771	32.2983	1253.6	2.0111
dtg5.1e-9:4	5	0.0845157	11.1648	1233.2	3.39064
dtg5.1e-9:5	5	0.072389	19.4529	1237	4.0132
dtg5.1e-9:6	5	0.0698285	29.3276	1191.4	1.52508
dtg5.1e-9:7	5	0.0641573	28.4457	1255	3.46321
dtg5.1e-9:8	5	0.0763497	15.793	1269.6	2.89433
BLANK:2	5	0.0439034	19.0214	1941	1.51209
dtg1.24e-8:2	5	0.0560222	50.7083	1134.2	2.90999
dtg1.24e-8:3	5	0.0443834	29.7332	1148.6	3.01048
dtg1.24e-8:4	5	0.066468	30.4425	1177.6	1.21721
dtg1.24e-8:5	5	0.0397007	17.6146	1147.4	2.91432
dtg1.24e-8:6	5	0.031172	43.9116	1185.8	3.43285
dtg1.24e-8:7	5	0.0565229	40.1086	1141.6	2.77317
dtg1.24e-8:8	5	0.061362	10.9473	1203.8	1.71443
dtg1.24e-8:9	5	0.0448906	40.5117	1177.4	4.13263
BLANK:1	5	0.0357698	25.6334	1904.8	0.891462
dtg6.14e-8:2	5	0.0796668	11.2654	1247	4.54072
dtg6.14e-8:3	5	0.050348	26.4727	1170.8	0.96994
dtg6.14e-8:4	5	0.0845478	13.6923	1251.2	1.82673
dtg6.14e-8:5	5	0.059404	30.7673	1197.8	2.16012
dtg6.14e-8:6	5	0.0911098	17.3086	1286.4	2.92885
dtg6.14e-8:7	5	0.0898773	21.1671	1257.6	2.46509
dtg6.14e-8:8	5	0.062172	27.8922	1182.4	1.71487
dtg6.14e-8:9	5	0.062744	30.4851	1170.2	3.02457
BLANK:1	5	0.0374312	19.742	1909.6	1.48408
dtg1.02e-7:1	5	0.0483967	39.2811	1270	2.66819
dtg1.02e-7:2	5	0.0473414	36.2823	1185.6	3.2555
dtg1.02e-7:3	5	0.0360215	44.2492	1199.6	2.44653
dtg1.02e-7:4	5	0.0494932	15.6639	1221.6	3.8341
dtg1.02e-7:5	5	0.0834769	28.6984	1202.2	1.16851
dtg1.02e-7:6	5	0.0593199	25.4772	1235.6	2.10041
dtg1.02e-7:7	5	0.0643006	27.0305	1217.4	1.9697
dtg1.02e-7:8	5	0.0757642	24.234	1159.2	3.63727
BLANK:1	5	0.0441332	30.306	2001.4	1.52074
dtg5e-7:2	5	0.0530396	25.6369	1082.4	1.72307
dtg5e-7:3	5	0.05416	28.6741	1151.4	1.71789
dtg5e-7:4	5	0.0598133	23.4237	1128.6	2.73344
dtg5e-7:5	5	0.0709489	12.4303	1114.2	3.57773
dtg5e-7:6	5	0.0576458	15.6007	1160.8	2.96508
dtg5e-7:7	5	0.0583993	20.3637	1142	2.34271
dtg5e-7:8	5	0.0614492	16.1205	1124.4	3.30173
dtg5e-7:9	5	0.0785411	16.3911	1116.4	2.29007
BLANK:1	5	0.039731	39.5543	1981.6	1.04494
dtg1.076e-6:1	5	0.0370318	70.4843	1177.4	3.17699
dtg1.076e-6:2	5	0.0725599	45.5136	1255.6	6.1516
dtg1.076e-6:3	5	0.058912	26.6137	1214.4	1.60309
dtg1.076e-6:4	5	0.0355009	48.5204	1150.8	3.02089
dtg1.076e-6:5	5	0.0587865	37.2142	1188	1.93943
dtg1.076e-6:6	5	0.0471484	40.9921	1226	2.1672
dtg1.076e-6:7	5	0.0419875	56.8959	1261.8	1.4446
dtg1.076e-6:9	5	0.0579155	18.0496	1198.2	3.42215
