# Supplementary material for: Spectrometric and computational studies of the binding of HIV-1 integrase inhibitors to viral DNA extremities
Source: PeerJ journal article supplement (doi:10.7717/peerj-pchem.6), 2019-12-02
Supplement: LTR32DTG174.xlsx [file LTR32DTG174.xlsx]

## Sheet: 32FDT095
BLANK:2	5	0.0346352	39.8579	1127	2.015
BLANK:3	5	0.0371246	14.8205	1132	2.59363
BLANK:4	5	0.0234138	40.8185	1180	2.78993
BLANK:6	5	0.0286485	28.3	1096.4	1.95674
BLANK:8	5	0.0390847	13.2682	1099.8	2.13112
BLANK:9	5	0.0376274	29.7899	1080.6	2.8488
BLANK:12	5	0.0252259	51.8788	1024	2.38449
BLANK:16	5	0.0444305	17.0163	1078	1.39147
BLANK:17	5	0.0272935	66.1381	1064.6	1.47285
BLANK:18	5	0.0393525	11.1781	1085.2	0.997339
LTR32fm8nM:1	5	0.0913638	9.94994	2769.6	1.24126
LTR32fm8nM:2	5	0.0972253	9.29131	2758.6	2.1189
LTR32fm8nM:3	5	0.087343	10.059	2873.8	1.0102
LTR32fm8nM:5	5	0.0921821	16.4164	2787.6	1.16017
LTR32fm8nM:7	5	0.0889231	16.2948	2857.6	1.31135
LTR32fm8nM:8	5	0.0964219	9.95538	2801.8	1.84621
LTR32fm8nM:9	5	0.0876911	11.2285	2787	2.11211
LTR32fm8nM:11	5	0.0925377	16.6448	2713.4	0.366805
BLANK:1	5	0.0384066	46.0744	1195	2.75147
dtg6.24e-13:1	5	0.0807674	20.8748	2646.6	1.4692
dtg6.24e-13:6	5	0.0975012	9.39427	2668.8	1.96285
dtg6.24e-13:7	5	0.0984172	11.7132	2686.4	1.36125
dtg6.24e-13:8	5	0.087065	9.21161	2696	1.08699
dtg6.24e-13:9	5	0.0978415	6.92054	2807	1.57699
dtg6.24e-13:11	5	0.0860042	11.2366	2657.4	2.53548
dtg6.24e-13:12	5	0.0780375	4.67984	2673.8	1.6674
dtg6.24e-13:13	5	0.0974802	5.86738	2635.2	2.66204
BLANK:1	5	0.0288612	38.9028	1128.4	2.97159
dtg1.24e-12:1	5	0.0950573	15.687	2725.6	2.37849
dtg1.24e-12:2	5	0.0886995	13.2936	2634.2	1.08532
dtg1.24e-12:3	5	0.0982492	7.31637	2716.8	2.90213
dtg1.24e-12:4	5	0.0946517	4.58671	2755.8	1.20183
dtg1.24e-12:9	5	0.0784648	7.76476	2730.8	2.77992
dtg1.24e-12:10	5	0.0938083	9.51939	2799.2	1.92666
dtg1.24e-12:11	5	0.0988041	7.46948	2694.4	0.828848
dtg1.24e-12:17	5	0.0999999	8.46247	2709.2	1.44966
BLANK:2	5	0.040981	40.9747	1110.2	1.60104
dtg2.5e-12:1	5	0.0922297	4.47558	2723.2	0.824935
dtg2.5e-12:2	5	0.0855199	9.67635	2698.6	1.26971
dtg2.5e-12:3	5	0.0966963	7.36231	2702.8	0.396939
dtg2.5e-12:4	5	0.100777	7.63194	2705.8	1.21044
dtg2.5e-12:5	5	0.109908	6.25522	2694.4	1.82734
dtg2.5e-12:6	5	0.0937941	16.0221	2694.6	1.25738
dtg2.5e-12:8	5	0.0952583	7.19547	2726.4	1.9745
dtg2.5e-12:9	5	0.0975623	6.05888	2697.2	1.86448
BLANK:1	5	0.0311318	52.8272	1051.2	2.78185
dtg5e-12:1	5	0.0885221	21.3605	2766.4	1.68415
dtg5e-12:2	5	0.0959433	12.7976	2669	1.86059
dtg5e-12:3	5	0.0982182	6.91687	2628.2	1.14555
dtg5e-12:4	5	0.10865	11.0463	2772.6	1.76267
dtg5e-12:5	5	0.0960073	6.91508	2684	1.21356
dtg5e-12:6	5	0.104627	6.4637	2675.6	2.73141
dtg5e-12:7	5	0.109951	5.45505	2727.4	1.28053
dtg5e-12:9	5	0.0903377	11.4435	2787	2.93352
BLANK:3	5	0.0410707	28.7261	1062	3.56599
dtg7.09e-12:2	5	0.0913908	8.07197	2631.4	1.39344
dtg7.09e-12:3	5	0.0962283	7.85524	2754	0.965895
dtg7.09e-12:5	5	0.100077	9.11788	2694.8	1.12019
dtg7.09e-12:6	5	0.0960806	10.9363	2696.8	2.13199
dtg7.09e-12:7	5	0.0960014	11.5109	2667	1.3221
dtg7.09e-12:10	5	0.0849808	3.11472	2672.2	2.08844
dtg7.09e-12:11	5	0.105112	6.02748	2794	1.75824
dtg7.09e-12:12	5	0.10501	8.63029	2721.4	1.52756
BLANK:1	5	0.0216814	75.9859	987.8	2.08883
dtg1.32e-11:1	5	0.0907963	9.12861	2772	2.15421
dtg1.32e-11:3	5	0.0938178	9.82147	2775.8	1.3548
dtg1.32e-11:4	5	0.1012	8.31039	2758.6	1.01369
dtg1.32e-11:5	5	0.0976003	9.47884	2844.4	1.20046
dtg1.32e-11:6	5	0.0909236	8.47907	2796.4	0.791216
dtg1.32e-11:7	5	0.103297	11.3087	2802.2	1.47389
dtg1.32e-11:8	5	0.103378	8.92693	2777.2	0.601659
dtg1.32e-11:9	5	0.115529	5.36046	2769	0.656681
BLANK:1	5	0.0341716	27.5472	988.6	1.3768
dtg5.65e-11:1	5	0.0922249	6.5795	2716	0.747395
dtg5.65e-11:3	5	0.101086	6.4943	2696.2	1.01961
dtg5.65e-11:4	5	0.0919234	10.8997	2777.8	1.60829
dtg5.65e-11:5	5	0.104589	9.10124	2667	1.11138
dtg5.65e-11:6	5	0.0908227	9.88364	2694.6	1.26768
dtg5.65e-11:7	5	0.0962146	4.75553	2737.8	0.804113
dtg5.65e-11:8	5	0.0961974	9.69143	2795	1.63599
dtg5.65e-11:9	5	0.0900094	14.2029	2708.8	0.827758
BLANK:2	5	0.0194727	55.8073	1049.4	1.62294
dtg1.05e-10:4	5	0.102434	4.6632	2710.2	0.505727
dtg1.05e-10:5	5	0.102692	13.9219	2676.2	1.56804
dtg1.05e-10:6	5	0.114843	6.11218	2614.4	1.72091
dtg1.05e-10:7	5	0.103233	8.09171	2655.2	0.726261
dtg1.05e-10:8	5	0.105481	6.09655	2602	1.64911
dtg1.05e-10:10	5	0.112492	4.00191	2658.6	0.590309
dtg1.05e-10:13	5	0.116666	3.1576	2645.2	0.605766
dtg1.05e-10:14	5	0.104093	10.1979	2605.2	1.09586
BLANK:1	5	0.039839	41.9237	970.2	1.74231
dtg5.35e-10:2	5	0.0865481	1.45955	2674.6	0.627575
dtg5.35e-10:5	5	0.093738	3.62937	2642	0.874116
dtg5.35e-10:7	5	0.101969	6.26943	2719.4	0.722902
dtg5.35e-10:8	5	0.0853636	9.56648	2711.8	1.22459
dtg5.35e-10:10	5	0.0958454	12.8426	2725.2	1.76933
dtg5.35e-10:11	5	0.0898343	7.31676	2737.4	1.74359
dtg5.35e-10:13	5	0.0938885	10.011	2700.4	0.86804
dtg5.35e-10:14	5	0.0892751	4.74691	2704.2	1.62792
BLANK:1	5	0.0374406	19.8075	933.4	2.10012
dtg1.03e-9:2	5	0.10428	4.46574	2739	1.27818
dtg1.03e-9:3	5	0.1015	3.86015	2773	1.04553
dtg1.03e-9:5	5	0.10443	8.80967	2738.8	1.0361
dtg1.03e-9:7	5	0.101612	8.63785	2757.4	1.18626
dtg1.03e-9:8	5	0.106007	5.43108	2784	0.760494
dtg1.03e-9:9	5	0.107373	7.83773	2707.6	1.42984
dtg1.03e-9:10	5	0.10424	4.97099	2692	1.88595
dtg1.03e-9:11	5	0.102217	6.38488	2778.8	0.979501
BLANK:2	5	0.032408	41.1148	965.4	0.819296
dtg5.1e-9:3	5	0.0958436	8.089	2624.6	0.850003
dtg5.1e-9:5	5	0.0923084	10.3502	2717.6	1.3671
dtg5.1e-9:6	5	0.105268	4.39884	2851.8	1.94367
dtg5.1e-9:7	5	0.0802671	5.84524	2868.4	1.55252
dtg5.1e-9:8	5	0.097245	4.36488	2748.6	1.09824
dtg5.1e-9:9	5	0.0850949	3.45316	2737.4	1.6431
dtg5.1e-9:10	5	0.092964	1.66774	2777	1.11175
dtg5.1e-9:11	5	0.105961	9.96837	2761	1.41437
dtg5.1e-9:12	5	0.0982432	5.01429	2770.8	1.47793
BLANK:1	5	0.0474845	30.248	998.8	1.87559
dtg1.24e-8:1	5	0.0973468	6.88402	2730.6	1.02093
dtg1.24e-8:2	5	0.0827941	11.6352	2708.4	2.00224
dtg1.24e-8:3	5	0.0948454	13.563	2687.4	0.94279
dtg1.24e-8:4	5	0.0836189	14.3714	2691.4	0.810243
dtg1.24e-8:6	5	0.0905886	12.7158	2742.4	1.52726
dtg1.24e-8:8	5	0.0913332	7.64262	2684.2	0.832548
dtg1.24e-8:9	5	0.0954538	4.76706	2751.4	1.09804
dtg1.24e-8:10	5	0.0879282	10.5107	2755	0.566569
BLANK:3	5	0.0414634	32.8537	923.6	2.40344
dtg6.24e-8:6	5	0.0808519	13.9412	2777.4	2.00954
dtg6.24e-8:8	5	0.0834741	10.5606	2779.6	0.439943
dtg6.24e-8:9	5	0.0896583	6.573	2764	1.11299
dtg6.24e-8:10	5	0.0828682	8.17394	2845.2	1.39065
dtg6.24e-8:11	5	0.100959	6.56142	2832.4	1.59248
dtg6.24e-8:12	5	0.10458	13.1544	2730.6	1.41668
dtg6.24e-8:13	5	0.090645	10.1161	2698.6	0.749086
dtg6.24e-8:14	5	0.0911418	6.78894	2797.4	0.561133
BLANK:5	5	0.0476433	32.0204	957.2	1.8487
dtg1.02e-7:2	5	0.098083	8.33828	2759.8	1.15763
dtg1.02e-7:3	5	0.091029	7.62902	2786.4	0.442843
dtg1.02e-7:4	5	0.0856698	7.18073	2826.6	0.735356
dtg1.02e-7:5	5	0.0818842	8.73383	2852	1.01861
dtg1.02e-7:7	5	0.0840879	8.21871	2778.6	0.730273
dtg1.02e-7:8	5	0.0883466	6.34244	2787.6	0.557755
dtg1.02e-7:9	5	0.101505	6.25814	2776.4	1.38003
dtg1.02e-7:10	5	0.0920536	7.74102	2740.8	1.39283
BLANK:3	5	0.0500346	13.5942	922.8	0.532428
dtg5e-7:1	5	0.0879182	11.5268	2781.6	1.43201
dtg5e-7:3	5	0.0808608	11.5254	2756.4	0.590516
dtg5e-7:4	5	0.0927469	7.48951	2808	0.828281
dtg5e-7:5	5	0.0801722	9.08205	2879.8	1.10954
dtg5e-7:6	5	0.0860944	7.52692	2807	1.1227
dtg5e-7:7	5	0.0929391	9.56576	2856.8	1.53295
dtg5e-7:8	5	0.0801151	7.36935	2808.2	0.575738
dtg5e-7:9	5	0.0867759	10.4987	2806	1.04799
BLANK:2	5	0.0468016	29.3116	965.8	1.32209
dtg1.076e-6:1	5	0.0940494	10.0784	2685.4	0.721157
dtg1.076e-6:4	5	0.102444	6.51503	2748.4	0.505919
dtg1.076e-6:5	5	0.0909498	8.32735	2790.2	0.673463
dtg1.076e-6:6	5	0.0925811	8.51142	2789.2	1.27087
dtg1.076e-6:7	5	0.0913321	5.52419	2744	0.602625
dtg1.076e-6:8	5	0.082102	12.0034	2774.4	1.14998
dtg1.076e-6:9	5	0.094039	12.8554	2760.2	1.22303
dtg1.076e-6:10	5	0.0806668	5.24623	2826	0.712335
