# Supplementary material for: Spectrometric and computational studies of the binding of HIV-1 integrase inhibitors to viral DNA extremities
Source: PeerJ journal article supplement (doi:10.7717/peerj-pchem.6), 2019-12-02
Supplement: LTR32EVG15.xls [file LTR32EVG15.xls]

## Sheet: EVG3215
BLANK:2	5	0.0107133	253.06	635.8	2.70342
BLANK:3	5	0.011945	129.626	677.4	1.80415
BLANK:4	5	0.0194244	91.6741	686.8	1.81998
BLANK:5	5	0.0145338	106.594	699	2.79172
BLANK:11	5	0.0240139	96.8929	705.4	4.63083
BLANK:13	5	0.00290845	777.964	665.2	4.47834
BLANK:17	5	0.011307	163.147	743.4	2.56028
BLANK:21	5	0.0074588	357.862	701	3.36976
LTR32:1	5	0.117572	9.23027	1637.4	1.33169
LTR32:2	5	0.105158	13.5757	1571	1.09883
LTR32:3	5	0.112313	16.008	1668.4	2.02227
LTR32:4	5	0.092202	8.18084	1664.6	1.60643
LTR32:5	5	0.106113	8.28034	1701.6	1.23478
LTR32:6	5	0.130873	7.28306	1691.6	1.40909
LTR32:7	5	0.123595	4.96851	1673.8	2.3827
LTR32:8	5	0.121727	12.5016	1674.6	1.36141
LTR32:9	5	0.102195	13.3423	1611.8	2.84039
LTR32:10	5	0.0881461	4.3638	1591.8	1.51105
LTR32:11	5	0.110043	3.73527	1594.4	1.11591
LTR32:12	5	0.0928511	8.27117	1575.4	1.24429
LTR32:13	5	0.0941583	9.14912	1580	1.43058
LTR32:14	5	0.130178	5.61407	1577.8	1.73345
LTR32:15	5	0.127747	9.40214	1576.6	1.5926
BLANK:1	5	0.0106389	87.5814	668	1.56149
LTR32+EVG(10-13):1	5	0.105484	18.6308	1472.2	1.57103
LTR32+EVG(10-13):2	5	0.117365	15.0595	1510.8	0.884425
LTR32+EVG(10-13):3	5	0.104331	8.07798	1449.4	2.11651
LTR32+EVG(10-13):4	5	0.108471	9.52291	1518.6	1.53115
LTR32+EVG(10-13):5	5	0.111174	7.42018	1452.2	1.26588
LTR32+EVG(10-13):6	5	0.0949702	12.2389	1490.4	1.71858
LTR32+EVG(10-13):7	5	0.104192	9.58218	1480	1.06876
LTR32+EVG(10-13):8	5	0.0884655	33.3926	1526.4	2.71211
LTR32+EVG(10-13):9	5	0.103102	11.5226	1473	2.18059
BLANK:6	5	0.00672474	88.4741	789.6	0.717092
LTR32+EVG(1E-12):1	5	0.0706998	39.6089	1470.6	2.82598
LTR32+EVG(1E-12):2	5	0.0976124	14.18	1370.8	1.61689
LTR32+EVG(1E-12):3	5	0.141589	6.19948	1342.8	1.58111
LTR32+EVG(1E-12):4	5	0.111899	9.30874	1377.2	1.53387
LTR32+EVG(1E-12):5	5	0.119293	19.3696	1422.6	1.43637
LTR32+EVG(1E-12):6	5	0.113643	4.3771	1372.4	2.21359
LTR32+EVG(1E-12):7	5	0.106516	5.60798	1383.6	2.57886
LTR32+EVG(1E-12):8	5	0.109837	11.1863	1410.2	1.576
LTR32+EVG(1E-12):9	5	0.110042	12.2348	1398.6	3.83905
LTR32+EVG(1E-12):10	5	0.116798	13.4174	1355.4	2.01485
BLANK:1	5	0.0106328	127.845	877.4	2.26935
LTR32+EVG(2.5E-12):1	5	0.128247	9.92043	1311.4	1.76729
LTR32+EVG(2.5E-12):2	5	0.0986234	13.9215	1360.6	1.76928
LTR32+EVG(2.5E-12):3	5	0.0788687	24.2653	1311.8	3.12997
LTR32+EVG(2.5E-12):4	5	0.138638	7.58298	1411.6	1.98824
LTR32+EVG(2.5E-12):5	5	0.104022	18.3701	1329.2	1.69393
LTR32+EVG(2.5E-12):6	5	0.114768	7.07937	1332	2.31587
LTR32+EVG(2.5E-12):7	5	0.116109	13.0853	1355	0.916319
LTR32+EVG(2.5E-12):8	5	0.114024	13.1414	1322.6	1.56292
BLANK:1	5	0.0109192	72.085	868.2	2.22523
LTR32+EVG(5E-12):1	5	0.114589	12.6396	1361.4	1.2643
LTR32+EVG(5E-12):2	5	0.103323	13.6677	1293	1.28122
LTR32+EVG(5E-12):3	5	0.117553	12.0007	1317	1.6254
LTR32+EVG(5E-12):4	5	0.118898	11.9883	1337.6	2.45455
LTR32+EVG(5E-12):5	5	0.0893825	12.2866	1310	2.34208
LTR32+EVG(5E-12):6	5	0.135676	15.7576	1286.6	2.6926
LTR32+EVG(5E-12):7	5	0.0990172	3.46659	1348.6	2.36592
LTR32+EVG(5E-12):8	5	0.109394	6.84138	1332.6	1.47039
BLANK:1	5	0.0281142	31.1744	942.2	1.63716
BLANK:2	5	0.0162407	85.9487	949.6	1.31132
LTR32+EVG(7E-12):1	5	0.116016	13.4932	1370	2.68972
LTR32+EVG(7E-12):2	5	0.104685	17.1918	1338.2	1.91065
LTR32+EVG(7E-12):3	5	0.08607	7.07451	1387.4	2.69563
LTR32+EVG(7E-12):4	5	0.118035	8.76773	1434.2	4.03789
LTR32+EVG(7E-12):5	5	0.11545	11.9568	1442.4	1.744
LTR32+EVG(7E-12):6	5	0.100043	12.7158	1317.6	1.01012
LTR32+EVG(7E-12):7	5	0.0992667	10.1238	1368.4	2.46686
LTR32+EVG(7E-12):8	5	0.124527	7.5923	1361.2	1.9049
LTR32+EVG(7E-12):9	5	0.104925	4.08397	1371.6	1.33032
LTR32+EVG(7E-12):10	5	0.0978637	16.09	1306.4	2.52452
LTR32+EVG(7E-12):11	5	0.101796	8.56992	1467.8	1.85214
LTR32+EVG(7E-12):12	5	0.105185	26.7256	1465.2	2.83295
LTR32+EVG(7E-12):13	5	0.0986606	7.84712	1352.4	2.2847
LTR32+EVG(7E-12):14	5	0.0907418	16.5124	1356.6	0.772553
BLANK:1	5	0.000451813	1742.26	1054	1.6207
LTR32+EVG(1E-11):1	5	0.134063	14.5387	1321.6	2.95141
LTR32+EVG(1E-11):2	5	0.123607	8.34201	1343.6	1.78277
LTR32+EVG(1E-11):3	5	0.136967	11.26	1352	1.31128
LTR32+EVG(1E-11):4	5	0.122342	8.32356	1387.8	2.05499
LTR32+EVG(1E-11):5	5	0.123973	9.66726	1411.8	1.41776
LTR32+EVG(1E-11):6	5	0.137864	1.21722	1401.4	3.42623
LTR32+EVG(1E-11):7	5	0.124272	10.4425	1427.6	0.97756
LTR32+EVG(1E-11):8	5	0.129548	11.0324	1417.8	1.44778
LTR32+EVG(1E-11):9	5	0.118876	13.6378	1372	0.890586
LTR32+EVG(1E-11):10	5	0.119991	10.5021	1433.4	1.80965
BLANK:1	5	-0.0101635	91.8116	1058.4	1.75305
BLANK:2	5	0.0124386	87.1195	1054	1.87198
LTR32+EVG(5E-11):1	5	0.0937522	9.84468	1412.2	0.692868
LTR32+EVG(5E-11):2	5	0.123229	9.89395	1467.4	1.70827
LTR32+EVG(5E-11):3	5	0.143809	10.4379	1417.2	0.595149
LTR32+EVG(5E-11):4	5	0.12151	12.0395	1493.6	1.73348
LTR32+EVG(5E-11):5	5	0.125234	5.59822	1485	2.47029
LTR32+EVG(5E-11):6	5	0.119793	13.4555	1553	1.66785
LTR32+EVG(5E-11):7	5	0.137269	12.8783	1558.6	2.28905
LTR32+EVG(5E-11):8	5	0.146971	9.02714	1485.2	1.70487
LTR32+EVG(5E-11):9	5	0.118661	13.0047	1494	1.15682
LTR32+EVG(5E-11):10	5	0.109877	11.8654	1556	1.23454
LTR32+EVG(5E-11):11	5	0.143926	6.80602	1579.6	3.07972
LTR32+EVG(5E-11):12	5	0.161986	15.6204	1534.4	1.1674
LTR32+EVG(5E-11):13	5	0.131964	8.03279	1591.6	1.04788
BLANK:1	5	-0.00409838	140.277	1106.8	2.40363
BLANK:2	5	0.0089017	99.0732	1057.2	1.3254
LTR32+EVG(1E-10):1	5	0.118344	8.72074	1405	1.67591
LTR32+EVG(1E-10):2	5	0.132906	10.8943	1512	4.03062
LTR32+EVG(1E-10):3	5	0.138933	5.75198	1545.2	1.30827
LTR32+EVG(1E-10):4	5	0.153126	8.25793	1525.6	2.33349
LTR32+EVG(1E-10):5	5	0.138348	7.80909	1568.4	1.97804
LTR32+EVG(1E-10):6	5	0.15241	6.30445	1508.2	0.694645
LTR32+EVG(1E-10):7	5	0.126877	14.5956	1512	2.57592
LTR32+EVG(1E-10):8	5	0.137063	8.90042	1551.6	2.00213
LTR32+EVG(1E-10):9	5	0.134448	8.79593	1549.8	0.577124
LTR32+EVG(1E-10):10	5	0.13219	9.74739	1515.6	0.996371
LTR32+EVG(1E-10):11	5	0.149189	7.33349	1556	2.42463
LTR32+EVG(1E-10):12	5	0.145345	8.60074	1507.4	1.39968
BLANK:1	5	0.0124841	84.8455	1078	2.02452
LTR32+EVG(5E-10):1	5	0.1381	8.92604	1307	1.79434
LTR32+EVG(5E-10):2	5	0.131048	7.18738	1400.6	0.844068
LTR32+EVG(5E-10):3	5	0.140433	4.37368	1453.4	1.9672
LTR32+EVG(5E-10):4	5	0.129494	7.55716	1458	1.80529
LTR32+EVG(5E-10):5	5	0.142467	11.7238	1431.6	1.27384
LTR32+EVG(5E-10):6	5	0.128471	8.08491	1471.2	1.19356
LTR32+EVG(5E-10):7	5	0.150885	11.1788	1463.8	1.85893
LTR32+EVG(5E-10):8	5	0.152616	6.06934	1467	3.30498
LTR32+EVG(5E-10):9	5	0.136239	14.692	1462.6	1.16203
LTR32+EVG(5E-10):10	5	0.131883	6.6645	1468.4	2.19426
BLANK:3	5	0.0170515	65.451	1057.8	1.39112
LTR32+EVG91E-9):1	5	0.106252	6.36581	1410	2.35012
LTR32+EVG91E-9):2	5	0.142541	11.2669	1471.2	2.27609
LTR32+EVG91E-9):3	5	0.174422	10.6514	1497.6	1.71058
LTR32+EVG91E-9):4	5	0.138246	6.38773	1543.4	1.07531
LTR32+EVG91E-9):5	5	0.141342	4.94911	1494	0.828312
LTR32+EVG91E-9):6	5	0.148705	12.6381	1500.8	1.8888
LTR32+EVG91E-9):7	5	0.162078	6.54089	1535.6	1.76003
LTR32+EVG91E-9):8	5	0.149237	13.9309	1546.6	2.07869
LTR32+EVG91E-9):9	5	0.148935	3.93735	1507.4	1.44939
LTR32+EVG91E-9):10	5	0.131843	7.16502	1512.2	2.87299
BLANK:1	5	0.00310293	409.192	1030.2	1.78759
LTR32+EVG(5E-9):1	5	0.159186	9.18689	1500	2.30761
LTR32+EVG(5E-9):2	5	0.159656	13.4239	1586.4	0.771667
LTR32+EVG(5E-9):3	5	0.152328	13.6621	1526.4	1.85886
LTR32+EVG(5E-9):4	5	0.139531	11.0469	1573.2	0.860967
LTR32+EVG(5E-9):5	5	0.155291	12.1548	1649.6	1.17241
LTR32+EVG(5E-9):6	5	0.130692	11.5646	1585.2	1.69337
LTR32+EVG(5E-9):7	5	0.166912	10.5375	1610	2.75761
LTR32+EVG(5E-9):8	5	0.16648	10.6035	1581.8	2.31308
BLANK:1	5	0.00198315	334.701	1142.8	2.43969
LTR32+EVG(1E-8):1	5	0.166366	11.4628	1487	2.47925
LTR32+EVG(1E-8):2	5	0.152438	6.97503	1397.4	1.17247
LTR32+EVG(1E-8):3	5	0.15493	11.7455	1396.4	1.24169
LTR32+EVG(1E-8):4	5	0.169549	5.43525	1425.8	1.82267
LTR32+EVG(1E-8):5	5	0.154261	5.74247	1417.2	1.24976
BLANK:1	5	0.0251824	38.6288	1120.4	6.13393
BLANK:2	5	0.00121111	869.443	1090.4	1.85485
LTR32+EVG(6E-8):1	5	0.158118	5.7572	1398	2.22719
LTR32+EVG(6E-8):2	5	0.174102	6.73715	1408.6	2.10334
LTR32+EVG(6E-8):3	5	0.16871	8.23519	1412.8	2.4785
LTR32+EVG(6E-8):4	5	0.150044	4.21265	1462	1.54189
LTR32+EVG(6E-8):5	5	0.17982	5.80838	1431.8	0.718187
BLANK:1	5	0.0208399	69.6157	1065.4	0.848188
BLANK:2	5	0.00905183	127.078	1112	1.13573
LTR32+EVG(1E-7):1	5	0.152241	13.3004	1372.8	1.92484
LTR32+EVG(1E-7):2	5	0.174017	9.42311	1416.2	1.28124
LTR32+EVG(1E-7):3	5	0.171343	5.64019	1556.4	1.61174
LTR32+EVG(1E-7):4	5	0.152523	10.2105	1439.6	1.8124
LTR32+EVG(1E-7):5	5	0.199458	8.76805	1437.2	1.52733
LTR32+EVG(6E-7):1	5	0.198601	2.57862	1372.2	2.02739
LTR32+EVG(6E-7):2	5	0.182834	7.96446	1361.2	1.6096
LTR32+EVG(6E-7):3	5	0.195462	6.69287	1306.2	1.03237
LTR32+EVG(1E-6):1	5	0.234893	5.16935	1441.2	1.67528
LTR32+EVG(1E-6):2	5	0.2203	7.42977	1388.4	1.10239
LTR32+EVG(1E-7):3	5	0.171343	5.64019	1556.4	1.61174
LTR32+EVG(1E-7):4	5	0.152523	10.2105	1439.6	1.8124
LTR32+EVG(1E-7):5	5	0.199458	8.76805	1437.2	1.52733
LTR32+EVG(6E-7):1	5	0.198601	2.57862	1372.2	2.02739
LTR32+EVG(6E-7):2	5	0.182834	7.96446	1361.2	1.6096
LTR32+EVG(6E-7):3	5	0.195462	6.69287	1306.2	1.03237
LTR32+EVG(1E-6):1	5	0.234893	5.16935	1441.2	1.67528
LTR32+EVG(1E-6):2	5	0.2203	7.42977	1388.4	1.10239
