# Supplementary material for: Spectrometric and computational studies of the binding of HIV-1 integrase inhibitors to viral DNA extremities
Source: PeerJ journal article supplement (doi:10.7717/peerj-pchem.6), 2019-12-02
Supplement: LTR32EVG1216.xls [file LTR32EVG1216.xls]

## Sheet: EVG1216
BLANK:1	5	-0.00600189	440.44	612.2	3.09814
BLANK:2	5	0.0162121	120.154	553.4	3.81129
BLANK:3	5	0.0297035	74.61	715.2	7.24907
BLANK:5	5	0.00170337	941.826	558.4	3.02412
BLANK:8	5	0.0046318	362.88	501.4	1.85877
BLANK:11	5	0.00856735	456.951	480.6	2.32968
BLANK:12	5	0.0174703	111.634	480.6	4.53705
BLANK:17	5	0.0263724	101.327	498	5.06884
BLANK:23	5	0.0230147	66.5899	403	2.79308
BLANK:24	5	0.0160421	83.2175	424.8	2.22753
LTR32(8nM):1	5	0.0737303	36.3451	401.8	2.43928
LTR32(8nM):2	5	0.0709233	35.2347	395.4	1.5246
LTR32(8nM):4	5	0.0133949	62.1785	408.6	2.62635
LTR32(8nM):5	5	0.0783697	35.1115	439	3.61635
LTR32(8nM):6	5	0.0474206	57.0967	428.6	5.76422
LTR32(8nM):7	5	0.0875457	32.8025	407.6	3.09613
LTR32(8nM):8	5	0.0406101	45.2696	425.8	3.04819
LTR32(8nM):9	5	0.051578	22.6709	419.6	1.85922
LTR32(8nM):10	5	0.0749204	13.2329	420.8	4.58016
LTR32(8nM):11	5	0.0878302	25.899	438.2	3.47144
LTR32(8nM):12	5	0.0652543	40.5554	442.2	0.80907
LTR32(8nM):13	5	0.0494574	33.2332	441.6	2.93215
BLANK:5	5	0.0063321	444.971	519.2	3.76658
LTR32+EVG(6.24E-13):1	5	0.108552	29.9653	446.6	5.53407
LTR32+EVG(6.24E-13):2	5	0.0640293	18.2334	448.6	3.64888
LTR32+EVG(6.24E-13):3	5	0.0806609	24.7515	458.8	4.10089
LTR32+EVG(6.24E-13):4	5	0.0775173	33.7773	468.6	3.89503
LTR32+EVG(6.24E-13):5	5	0.0859017	38.8152	488.2	2.68294
LTR32+EVG(6.24E-13):6	5	0.120665	31.5868	493.2	5.20917
LTR32+EVG(6.24E-13):7	5	0.0611688	69.6305	549.2	7.7546
LTR32+EVG(6.24E-13):8	5	0.0848469	38.6931	570	4.08376
BLANK:2	5	0.0156788	81.454	667	3.88795
LTR32+EVG(1.24E-12):1	5	0.136887	26.4123	348.4	6.68876
LTR32+EVG(1.24E-12):2	5	0.0521872	46.6646	424	9.41891
LTR32+EVG(1.24E-12):3	5	0.109785	47.9352	424	4.80345
LTR32+EVG(1.24E-12):4	5	0.0654646	50.5516	444.6	4.65788
LTR32+EVG(1.24E-12):5	5	0.0618961	57.7698	492.4	8.93227
LTR32+EVG(1.24E-12):6	5	0.0610407	31.3053	486.4	2.76489
LTR32+EVG(1.24E-12):7	5	0.0345243	91.8212	524.2	5.6389
LTR32+EVG(1.24E-12):8	5	0.0332861	71.8144	557.2	3.07798
LTR32+EVG(1.24E-12):9	5	0.0614386	12.7524	568.8	4.23819
LTR32+EVG(1.24E-12):10	5	0.0812548	30.5187	522.6	7.53291
LTR32+EVG(1.24E-12):11	5	0.06913	59.9954	607	3.03282
LTR32+EVG(1.24E-12):12	5	0.0396057	52.4507	551.4	2.93585
BLANK:1	5	0.0168632	39.8037	665.6	3.41796
LTR32+DTG(2.5E-12):1	5	0.105236	40.4184	547.4	5.14761
LTR32+DTG(2.5E-12):3	5	0.061001	23.7712	586.8	7.06426
LTR32+DTG(2.5E-12):4	5	0.155922	30.7806	549.8	4.73235
LTR32+DTG(2.5E-12):5	5	0.0505809	75.2453	611.8	4.48485
LTR32+DTG(2.5E-12):6	5	0.0588204	21.6517	638.8	1.93292
LTR32+DTG(2.5E-12):7	5	0.0660888	55.73	626.4	4.62577
LTR32+DTG(2.5E-12):8	5	0.0410017	47.9284	648	5.03205
LTR32+DTG(2.5E-12):9	5	0.0910703	32.389	694.8	2.4129
LTR32+DTG(2.5E-12):10	5	0.0422778	28.2703	680.4	2.61016
LTR32+DTG(2.5E-12):11	5	0.0694472	25.8198	685.6	3.40739
LTR32+DTG(2.5E-12):12	5	0.088474	18.7862	678.4	3.0556
BLANK:1	5	0.00378301	131.582	916	0.484549
LTR32+DTG(5E-12):1	5	0.132251	7.28267	588.2	3.5013
LTR32+DTG(5E-12):2	5	0.151767	12.8952	469.8	3.92338
LTR32+DTG(5E-12):3	5	0.120947	39.1685	514	4.76912
LTR32+DTG(5E-12):4	5	0.16224	27.7611	577	2.21336
LTR32+DTG(5E-12):5	5	0.0910422	39.065	523.8	5.32211
LTR32+DTG(5E-12):6	5	0.114149	55.0506	540.2	4.8828
LTR32+DTG(5E-12):7	5	0.123132	12.069	543	6.21666
BLANK:1	5	0.00482171	772.157	1093.8	7.67281
LTR32+EVG(7E-12):1	5	0.123812	18.6445	363.6	11.7542
LTR32+EVG(7E-12):2	5	0.0841813	35.498	376.8	5.66264
LTR32+EVG(7E-12):3	5	0.0619863	68.08	356.8	10.0681
LTR32+EVG(7E-12):4	5	0.0890992	56.212	396.4	7.23159
LTR32+EVG(7E-12):5	5	0.128234	44.4982	424.8	6.76993
LTR32+EVG(7E-12):6	5	0.0999881	27.3576	442.4	4.37981
LTR32+EVG(7E-12):7	5	0.118266	36.3041	402.6	4.92443
LTR32+EVG(7E-12):8	5	0.0957376	38.5927	381.4	7.65196
BLANK:1	5	0.00557851	156.952	1045.8	2.91202
LTR32+EVG(1E-11):1	5	0.12764	29.481	748.6	10.4838
LTR32+EVG(1E-11):2	5	0.113733	29.5624	682.6	8.29364
LTR32+EVG(1E-11):3	5	0.064853	44.2917	581.8	4.79438
LTR32+EVG(1E-11):4	5	0.0983021	11.3527	675.8	8.2366
LTR32+EVG(1E-11):5	5	0.115435	29.9405	602.8	6.26288
LTR32+EVG(1E-11):6	5	0.0245642	130.058	612.2	10.7807
LTR32+EVG(1E-11):7	5	0.182613	38.7204	673.6	11.2892
LTR32+EVG(1E-11):8	5	0.0903942	24.9477	573	8.01015
LTR32+EVG(1E-11):9	5	0.11222	46.1471	576.8	1.98174
LTR32+EVG(1E-11):10	5	0.107497	25.5018	556.6	4.86934
BLANK:1	5	0.0125594	68.8365	1240.6	6.83988
LTR32+EVG(5E-12):1	5	0.134913	67.7196	470.2	4.6805
LTR32+EVG(5E-11):1	5	0.167219	20.5983	364.2	3.90765
LTR32+EVG(5E-11):2	5	0.181258	20.9678	410.6	9.97719
LTR32+EVG(5E-11):3	5	0.19124	20.137	326	10.2761
LTR32+EVG(5E-11):4	5	0.113731	18.2544	516.6	4.16313
LTR32+EVG(5E-11):5	5	0.109937	30.5328	483.4	4.96699
LTR32+EVG(5E-11):6	5	0.175266	16.3488	369	8.64053
LTR32+EVG(5E-11):7	5	0.0197122	404.102	435.4	11.8704
LTR32+EVG(5E-11):8	5	0.152629	35.1779	419.6	10.2338
LTR32+EVG(5E-11):9	5	0.150891	59.1743	385.6	3.65508
LTR32+EVG(5E-11):10	5	0.102611	33.1574	457.6	13.5902
BLANK:1	5	0.00276684	362.967	1139.4	2.32166
LTR32+EVG(1E-10):1	5	0.0807282	58.3109	542.2	4.85226
LTR32+EVG(1E-10):2	5	0.1417	38.0888	572	5.905
LTR32+EVG(1E-10):3	5	0.0288415	216.481	503.8	3.374
LTR32+EVG(1E-10):4	5	0.113343	30.5303	549.6	5.35998
LTR32+EVG(1E-10):5	5	0.0872511	76.3756	564.6	9.72675
LTR32+EVG(1E-10):6	5	0.126345	16.9936	594.4	6.89164
LTR32+EVG(1E-10):7	5	0.113111	33.9762	514.6	1.39995
LTR32+EVG(1E-10):8	5	0.0959883	56.3206	568.6	6.17779
LTR32+EVG(1E-10):9	5	0.154324	32.506	541.8	2.86553
LTR32+EVG(1E-10):10	5	0.157116	11.5047	591.8	6.30473
BLANK:1	5	0.0178357	72.9449	1294.2	1.40521
LTR32+EVG(5.37E-10):1	5	0.105726	10.8402	409.4	7.20198
LTR32+EVG(5.37E-10):2	5	0.0848229	65.7433	373	6.43677
LTR32+EVG(5.37E-10):3	5	0.101936	13.1934	325	16.0742
LTR32+EVG(5.37E-10):4	5	0.0708967	71.515	418.8	10.6536
LTR32+EVG(5.37E-10):5	5	0.129221	19.0664	357.6	4.49555
LTR32+EVG(5.37E-10):6	5	0.0620955	35.0964	372.2	5.23505
LTR32+EVG(5.37E-10):7	5	0.088422	44.4899	303.6	6.48002
LTR32+EVG(5.37E-10):8	5	0.129563	14.9235	379	7.25445
LTR32+EVG(5.37E-10):9	5	0.188485	20.533	382.6	3.05076
LTR32+EVG(5.37E-10):10	5	0.125115	16.914	369	5.73118
BLANK:1	5	0.00504715	202.478	1233.4	2.32403
LTR32+EVG(1E-9):1	5	0.137791	34.9421	594.4	3.12232
LTR32+EVG(1E-9):2	5	0.059741	47.8682	531	5.79769
LTR32+EVG(1E-9):3	5	0.0972368	29.0203	547.6	4.54414
LTR32+EVG(1E-9):4	5	0.18806	18.716	637.8	6.06479
LTR32+EVG(1E-9):5	5	0.0699591	45.9425	537.8	3.82988
LTR32+EVG(1E-9):6	5	0.128895	30.273	603.8	1.20161
LTR32+EVG(1E-9):7	5	0.119944	54.1374	574.2	16.088
LTR32+EVG(1E-9):8	5	0.0762131	55.0334	555.6	3.64576
LTR32+EVG(1E-9):9	5	0.129317	21.581	538	3.3481
LTR32+EVG(1E-9):10	5	0.0747266	56.4432	485.4	4.75687
BLANK:1	5	0.0187945	74.1747	1443.4	2.20805
LTR32+EVG(5E-9):1	5	0.126531	65.8168	421.4	17.072
LTR32+EVG(5E-9):2	5	0.0699012	32.9284	394.8	4.76796
LTR32+EVG(5E-9):3	5	0.266252	62.3049	869.6	46.2338
LTR32+EVG(5E-9):4	5	0.0649808	37.0117	404.2	3.7947
LTR32+EVG(5E-9):5	5	0.109284	54.0586	358.8	4.87888
LTR32+EVG(5E-9):6	5	0.0353365	142.6	411	11.3604
LTR32+EVG(5E-9):7	5	0.0758328	45.7012	494.2	5.86828
LTR32+EVG(5E-9):8	5	0.0626098	49.2458	375.4	6.48268
LTR32+EVG(5E-9):9	5	0.0890625	45.4606	368.8	7.07768
LTR32+EVG(5E-9):10	5	0.0826059	57.7775	451.2	2.70227
BLANK:1	5	0.0277762	14.7672	1319.4	1.36354
BLANK:2	5	0.0196212	40.9181	1442.8	1.64388
LTR32+EVG(1.24E-8):1	5	0.0654805	36.3996	396.6	4.60505
LTR32+EVG(1.24E-8):2	5	0.0626859	51.1602	538.2	3.42959
LTR32+EVG(1.24E-8):3	5	0.0117148	469.155	513.2	4.68587
LTR32+EVG(1.24E-8):4	5	0.11756	29.4116	477.6	9.99768
LTR32+EVG(1.24E-8):5	5	0.0181726	145.815	455.8	7.88985
LTR32+EVG(1.24E-8):6	5	0.0484958	60.2354	374.8	3.57524
LTR32+EVG(1.24E-8):7	5	0.0623915	47.1003	419.2	5.29505
LTR32+EVG(1.24E-8):8	5	0.0633304	77.5641	519.8	9.53418
BLANK:1	5	0.00773253	180.207	1482.2	4.1438
LTR32+EVG(6E-8):1	5	0.0809399	60.0356	530.6	12.8738
LTR32+EVG(6E-8):2	5	0.0766571	83.054	594.2	8.79526
LTR32+EVG(6E-8):3	5	0.131534	28.0425	508.6	1.09012
LTR32+EVG(6E-8):6	5	0.0902614	36.1699	514.8	4.47324
LTR32+EVG(6E-8):8	5	0.0949751	34.7112	726	3.40011
LTR32+EVG(6E-8):9	5	0.116302	26.8089	533	6.95309
LTR32+EVG(6E-8):10	5	0.0649095	53.0959	605.8	2.9404
LTR32+EVG(6E-8):11	5	0.090896	37.454	542	10.0839
LTR32+EVG(6E-8):12	5	-0.0258123	468.418	676.6	4.01058
LTR32+EVG(6E-8):13	5	0.0389244	115.167	756.4	7.52195
BLANK:2	5	0.0222004	106.977	1559.2	3.12119
LTR32+EVG(1E-7):1	5	0.0231289	183.399	546	9.36781
LTR32+EVG(1E-7):2	5	-0.0481016	66.9957	573.4	6.07662
LTR32+EVG(1E-7):3	5	-0.0361144	98.9766	651.8	3.78705
LTR32+EVG(1E-7):4	5	0.0395739	74.4962	656.2	8.09126
LTR32+EVG(1E-7):5	5	0.0817632	50.4909	488.8	8.22107
LTR32+EVG(1E-7):6	5	-0.0035913	1056.61	562	8.88494
LTR32+EVG(1E-7):7	5	0.0158365	246.636	509.4	6.56525
LTR32+EVG(1E-7):8	5	0.0683413	48.9668	646.8	9.07757
LTR32+EVG(1E-7):9	5	0.0921975	45.6963	569.2	4.58353
LTR32+EVG(1E-7):10	5	0.0760944	50.436	681.2	3.68248
LTR32+EVG(1E-7):11	5	0.0629974	46.7912	651.6	4.37893
LTR32+EVG(1E-7):12	5	0.0345793	127.62	637.4	3.97752
LTR32+EVG(1E-7):13	5	0.0514187	22.9282	612.6	5.23113
LTR32+EVG(1E-7):14	5	-0.00995436	323.163	605.2	6.41328
BLANK:1	5	0.0231794	69.1798	1696	1.66437
LTR32+EVG(6E-7):1	5	0.035527	84.9822	509.2	3.35436
LTR32+EVG(6E-7):2	5	0.0130863	191.723	591.8	10.661
LTR32+EVG(6E-7):3	5	0.0475361	18.3576	519.6	3.68923
LTR32+EVG(6E-7):4	5	0.0162066	224.363	562.2	6.64073
LTR32+EVG(6E-7):5	1	0.141964	0	536	0
LTR32+EVG(6E-7):6	5	-0.0277439	63.5986	564.8	5.9537
LTR32+EVG(6E-7):7	5	0.0720622	60.2473	584.8	9.66337
LTR32+EVG(6E-7):8	5	0.092427	51.2344	637.8	7.37032
LTR32+EVG(6E-7):9	5	0.00158392	1386.64	644.4	3.53348
LTR32+EVG(1E-6):1	2	0.136922	90.7629	585	10.0855
LTR32+EVG(1E-6):2	5	0.0910155	27.8842	569.8	8.30051
LTR32+EVG(1E-6):3	5	0.0960796	23.186	622.2	5.08379
LTR32+EVG(1E-6):4	5	0.0206044	86.9945	686	6.73495
LTR32+EVG(1E-6):5	5	0.0128739	130.838	603	2.26415
LTR32+EVG(1E-6):6	5	0.0792327	48.036	634.6	5.37612
LTR32+EVG(1E-6):7	5	0.00184025	1469.72	610.8	4.57461
