# Supplementary material for: Spectrometric and computational studies of the binding of HIV-1 integrase inhibitors to viral DNA extremities
Source: PeerJ journal article supplement (doi:10.7717/peerj-pchem.6), 2019-12-02
Supplement: LTR32RAL1816.xls [file LTR32RAL1816.xls]

## Sheet: RAL1816
BLANK:2	5	0.00523865	360.507	447.4	0.585418
BLANK:11	5	0.00458398	336.981	434.4	1.78996
LTR32(8nM):1	5	0.0879024	4.71625	3057.6	1.75494
LTR32(8nM):2	5	0.0992462	5.69817	3020	1.21016
LTR32(8nM):3	5	0.105467	8.5154	3040.8	0.915829
LTR32(8nM):4	5	0.0998991	5.79099	3034.8	1.01751
LTR32(8nM):5	5	0.109224	8.39258	3137.8	0.850825
LTR32(8nM):6	5	0.109947	7.33937	3141.2	0.369148
LTR32(8nM):7	5	0.116721	6.72182	3112	1.04997
LTR32(8nM):8	5	0.0964198	1.69934	3106.2	0.773024
LTR32(8nM):9	5	0.0706621	7.00287	3571.4	1.23444
LTR32(8nM):10	5	0.0883459	7.86962	3636.8	0.479295
LTR32(8nM):11	5	0.0748722	7.36561	3758	0.423557
LTR32(8nM):12	5	0.0826747	10.0648	3760.6	0.382862
LTR32(8nM):13	5	0.0877354	3.69374	3772.4	0.668851
LTR32(8nM):14	5	0.0781285	5.81188	3808.4	1.79147
BLANK:1	5	0.0138233	91.8108	429.6	2.42309
LTR32+RAL(6.24E-13):1	5	0.071817	8.02135	3831.2	1.75038
LTR32+RAL(6.24E-13):2	5	0.0786822	10.7141	3869.2	0.34976
LTR32+RAL(6.24E-13):3	5	0.0735172	5.96039	3841	0.440644
LTR32+RAL(6.24E-13):4	5	0.0789425	2.38061	3946	0.495994
LTR32+RAL(6.24E-13):5	5	0.085675	3.11246	3895.8	1.01839
LTR32+RAL(6.24E-13):6	5	0.078588	4.06881	3869	0.832345
LTR32+RAL(6.24E-13):7	5	0.0780086	5.53082	3945.6	0.770053
LTR32+RAL(6.24E-13):8	5	0.0717135	6.9833	3958.8	0.66639
BLANK:1	5	0.00946099	155.089	517.8	2.49378
LTR32+RAL(1.24E-12):1	5	0.0722837	7.95359	3917.4	1.16579
LTR32+RAL(1.24E-12):2	5	0.0793861	7.79677	3931.8	0.930628
LTR32+RAL(1.24E-12):3	5	0.0750014	10.515	4024	0.806426
LTR32+RAL(1.24E-12):4	5	0.0730556	5.83808	4062.2	1.4042
LTR32+RAL(1.24E-12):5	5	0.0750496	12.147	4011.4	1.00614
LTR32+RAL(1.24E-12):6	5	0.0812435	1.79746	4075.6	0.683351
BLANK:1	5	0.00338317	1400.22	622.8	3.11654
LTR32+RAL(2.5E-12):1	5	0.0768559	12.5857	4096	0.870675
LTR32+RAL(2.5E-12):2	5	0.0747311	7.78139	4065.8	0.921839
LTR32+RAL(2.5E-12):3	5	0.0857664	8.58015	4148.8	0.525022
LTR32+RAL(2.5E-12):4	5	0.0781796	7.34234	4038.8	0.689044
LTR32+RAL(2.5E-12):5	5	0.0918479	7.10276	4191.8	0.578263
BLANK:2	5	0.0133371	229.771	669.8	6.4329
LTR32+RAL(5E-12):1	5	0.0714334	7.69827	4061.8	1.01266
LTR32+RAL(5E-12):2	5	0.085578	12.5917	4141	0.864627
LTR32+RAL(5E-12):3	5	0.096523	10.9057	4169.8	0.966464
LTR32+RAL(5E-12):4	5	0.0862267	4.4414	4166.8	0.91322
LTR32+RAL(5E-12):5	5	0.0835211	5.87237	4087.4	0.847875
LTR32+RAL(5E-12):6	5	0.0768279	13.564	4190.4	0.631718
LTR32+RAL(5E-12):7	5	0.0803167	11.1135	4107.8	0.935599
BLANK:1	5	-0.0202392	127.508	656.8	6.71546
BLANK:2	5	0.0151585	107.138	663.8	2.5183
LTR32+RAL(7E-12):1	5	0.0663192	5.84541	4175.6	1.33187
LTR32+RAL(7E-12):2	5	0.0808577	12.1759	4214	1.27009
LTR32+RAL(7E-12):3	5	0.0731595	12.8485	4178.6	1.41881
LTR32+RAL(7E-12):4	5	0.0869635	9.28102	4218	0.856686
LTR32+RAL(7E-12):5	5	0.0920862	10.4915	4197.6	1.64211
LTR32+RAL(7E-12):6	5	0.0770991	10.6049	4242.2	0.929314
BLANK:1	5	0.0307463	89.6375	765.8	6.47976
BLANK:2	5	-0.00668132	205.178	772.6	2.47877
BLANK:3	5	0.0142146	161.287	758.2	2.35691
LTR32+RAL(1.32E-11):1	5	0.082196	5.13409	4206.2	0.894361
LTR32+RAL(1.32E-11):2	5	0.0857647	8.42125	4191.2	1.758
LTR32+RAL(1.32E-11):3	5	0.0953674	2.63668	4266.8	1.19975
LTR32+RAL(1.32E-11):4	5	0.0808078	4.11668	4315.2	0.717329
LTR32+RAL(1.32E-11):5	5	0.0734494	8.06084	4237.2	0.95346
LTR32+RAL(1.32E-11):6	5	0.0805915	3.77505	4263.4	0.688073
LTR32+RAL(1.32E-11):7	5	0.0835261	5.13381	4241.2	0.646989
BLANK:1	5	0.0100702	215.518	852	4.065
LTR32+RAL(5.65E-11):1	5	0.0848907	9.27024	4172	1.62838
LTR32+RAL(5.65E-11):2	5	0.0740425	6.44748	4195.6	0.952503
LTR32+RAL(5.65E-11):3	5	0.0748025	9.18174	4244.4	0.577813
LTR32+RAL(5.65E-11):4	5	0.0781641	9.05957	4195	0.736086
LTR32+RAL(5.65E-11):5	5	0.0832463	5.69623	4134	1.38362
LTR32+RAL(5.65E-11):6	5	0.069435	4.60651	4238.8	0.857949
LTR32+RAL(5.65E-11):7	5	0.0729645	8.44765	4185.8	0.950924
BLANK:2	5	0.00615804	291.782	892.4	1.86049
LTR32+RAL(1E-10):1	5	0.0861103	8.47572	4084.2	0.63043
LTR32+RAL(1E-10):2	5	0.085621	10.7594	4183.2	1.19005
LTR32+RAL(1E-10):3	5	0.0664458	6.56763	4206	1.4711
LTR32+RAL(1E-10):4	5	0.100793	6.20332	4334	0.866116
LTR32+RAL(1E-10):5	5	0.0776601	11.7453	4227.8	0.774554
LTR32+RAL(1E-10):6	5	0.0827229	4.69198	4251	0.777983
BLANK:1	5	0.0209642	129.244	966.2	3.55052
BLANK:2	5	0.0197651	105.024	1020.2	2.80025
BLANK:3	5	0.0125094	91.4268	899	3.47241
LTR32+RAL(5.37E-10):1	5	0.0767926	3.30328	4196.8	1.00126
LTR32+RAL(5.37E-10):2	5	0.0794597	8.95318	4205.4	0.543525
LTR32+RAL(5.37E-10):3	5	0.0800074	13.7696	4281.2	1.01687
LTR32+RAL(5.37E-10):4	5	0.0881695	7.2306	4208.2	1.12129
LTR32+RAL(5.37E-10):5	5	0.0884533	5.93521	4249.4	1.43597
LTR32+RAL(5.37E-10):6	5	0.0835154	13.9267	4163.2	0.933954
BLANK:1	5	0.0138083	140.629	891.2	1.55091
LTR32+RAL(1E-9):1	5	-1.03709	86.221	70.8	22.0221
LTR32+RAL(1E-9):2	5	-0.0955185	491.923	36.8	77.529
LTR32+RAL(1E-9):3	1	-0.493882	0	93.8	0
LTR32+RAL(1E-9):4	5	0.195193	124.896	86	34.6473
LTR32+RAL(1E-9):5	5	-0.0383686	343.293	142.6	20.5045
LTR32+RAL(1E-9):6	5	1.00292	94.4167	45	55.6683
LTR32+RAL(1E-9):7	5	0.18493	106.442	357.6	36.2954
LTR32+RAL(1E-9):8	5	0.0842927	9.02097	2913.8	1.1383
LTR32+RAL(1E-9):9	5	0.0890565	8.07308	2893.8	1.31887
LTR32+RAL(1E-9):10	5	0.0961752	7.97187	2949.8	1.60293
LTR32+RAL(1E-9):11	5	0.0963166	10.6815	2992.8	1.39391
LTR32+RAL(1E-9):12	5	0.0884968	10.4144	2997.8	1.66365
LTR32+RAL(1E-9):13	5	0.0953618	6.70872	2989.4	1.50961
LTR32+RAL(1E-9):14	5	0.0945472	2.11156	3001.6	1.49696
LTR32+RAL(1E-9):15	5	0.0933719	5.41735	3004.2	0.878391
LTR32+RAL(1E-9):16	5	0.166608	50.0843	239	15.1753
LTR32+RAL(1E-9):17	5	0.100624	11.902	3188	1.58813
LTR32+RAL(1E-9):18	5	0.101933	6.60506	3037.6	0.752251
LTR32+RAL(1E-9):19	5	0.0983592	7.05714	3054.8	0.929189
LTR32+RAL(1E-9):20	5	0.0988535	9.33516	3125.6	1.07117
BLANK:5	5	0.0117895	78.639	1167.6	3.08938
LTR32+RAL(5E-9):1	5	0.0821523	5.34091	4157.4	1.26764
LTR32+RAL(5E-9):2	5	0.0741039	4.83574	4133.6	2.03373
LTR32+RAL(5E-9):3	5	0.079821	6.01126	4190.4	0.839222
LTR32+RAL(5E-9):4	5	0.0889355	6.56368	4251	0.530754
LTR32+RAL(5E-9):5	5	0.0797499	9.20333	4238.8	0.674142
LTR32+RAL(5E-9):6	5	0.0772444	10.5882	4287	1.21065
LTR32+RAL(5E-9):7	5	0.095439	5.018	4150.8	1.53917
LTR32+RAL(5E-9):8	5	0.0816836	9.47316	4261.6	0.563677
LTR32+RAL(5E-9):9	5	0.0807933	14.2229	4346.8	0.965258
BLANK:4	5	0.0113228	108.518	1207	1.869
LTR32+RAL(1.24E-8):1	5	0.0569128	8.24967	4167.4	0.837435
LTR32+RAL(1.24E-8):2	5	0.0694746	6.7293	4235.4	1.22971
LTR32+RAL(1.24E-8):3	5	0.0811403	11.5333	4319.8	1.67267
LTR32+RAL(1.24E-8):4	5	0.0662259	5.048	4263	0.985026
LTR32+RAL(1.24E-8):5	5	0.0806437	7.17853	4195.4	1.16054
LTR32+RAL(1.24E-8):6	5	0.0855144	11.9487	4348.2	0.730143
LTR32+RAL(1.24E-8):7	5	0.0854014	9.54776	4340.6	1.66067
LTR32+RAL(1.24E-8):8	5	0.0822284	5.34199	4216	1.5969
LTR32+RAL(1.24E-8):9	5	0.081321	10.2426	4294.8	0.759229
LTR32+RAL(1.24E-8):10	5	0.0747401	8.16138	4313.2	1.85452
LTR32+RAL(1.24E-8):11	5	0.0756137	9.62971	4359	1.15524
LTR32+RAL(1.24E-8):12	5	0.0828629	4.71887	4320.6	1.27454
LTR32+RAL(1.24E-8):13	5	0.0848233	7.22874	4188.4	0.751247
BLANK:1	5	0.0129705	105.626	1293.2	1.7965
LTR32+RAL(6E-8):1	5	0.0754095	11.1112	4257.2	1.16962
LTR32+RAL(6E-8):2	5	0.0715268	9.38545	4171.2	1.13813
LTR32+RAL(6E-8):3	5	0.062399	15.0315	4267.2	1.28336
LTR32+RAL(6E-8):4	5	0.0707831	4.77696	4194.4	0.71403
LTR32+RAL(6E-8):5	5	0.0796864	5.18468	4294.8	1.21173
LTR32+RAL(6E-8):6	5	0.0623299	17.6168	4227	1.71552
LTR32+RAL(6E-8):7	5	0.0629236	11.523	4357.2	0.486778
LTR32+RAL(6E-8):8	5	0.0609518	5.42188	4314.2	0.62238
LTR32+RAL(6E-8):9	5	0.0706528	5.73634	4255.8	0.826759
LTR32+RAL(6E-8):10	5	0.0740019	6.01721	4233.8	1.31384
LTR32+RAL(6E-8):11	2	0.0922418	8.71722	2759.3	2.44627
LTR32+RAL(6E-8):12	5	0.0989418	5.28738	2840.8	1.17247
LTR32+RAL(6E-8):13	5	0.0925084	4.06887	2852.4	1.5032
LTR32+RAL(1E-7):1	5	0.103595	16.2098	2915	1.93326
LTR32+RAL(1E-7):2	5	0.102663	13.5216	2940	0.585923
LTR32+RAL(1E-7):3	5	0.0956462	6.26619	2853	1.33333
LTR32+RAL(1E-7):4	5	0.107777	8.15431	2904.4	2.18564
LTR32+RAL(1E-7):5	5	0.104942	6.22732	2880.8	1.66037
LTR32+RAL(6E-7):1	5	0.088015	8.49172	2863.4	1.49661
LTR32+RAL(6E-7):2	5	0.096011	10.7817	2860	0.5025
LTR32+RAL(6E-7):3	5	0.110232	9.58923	2972.2	1.339
LTR32+RAL(6E-7):4	5	0.107648	9.73431	2880.8	1.67295
LTR32+RAL(6E-7):5	5	0.0891253	10.9603	2881	1.60732
LTR32+RAL(1E-6):1	5	0.100508	11.6133	2837.4	2.00364
LTR32+RAL(1E-6):2	5	0.103212	2.84702	2827.6	1.29703
LTR32+RAL(1E-6):3	5	0.0923725	8.27077	2854.2	0.458103
LTR32+RAL(1E-6):4	5	0.0952216	6.80201	2913.2	0.625515
LTR32+RAL(1E-6):5	5	0.091938	19.1828	2866.4	1.52686
LTR32+RAL(5.32E-6):1	5	0.0945083	11.9478	2976.2	0.4322
LTR32+RAL(5.32E-6):2	5	0.106368	8.67718	2983	0.967506
LTR32+RAL(5.32E-6):3	5	0.0981245	7.94749	2975	0.963798
LTR32+RAL(5.32E-6):4	5	0.0952759	2.42533	2889.2	1.27532
LTR32+RAL(1E-5):1	5	0.102712	11.8862	3051.4	1.71909
LTR32+RAL(1E-5):2	5	0.0824308	8.81039	2991.2	1.38349
LTR32+RAL(1E-5):3	5	0.110371	9.79761	3077.6	1.01622
LTR32+RAL(1E-5):4	5	0.105241	4.5279	3076	1.44386
LTR32+RAL(1E-5):5	5	0.0862437	2.93463	3025.2	1.27539
LTR32+RAL(4.5E-5):1	5	0.104747	9.45875	3138.2	1.05732
LTR32+RAL(4.5E-5):2	5	0.10354	8.34791	3068	0.595633
LTR32+RAL(4.5E-5):3	5	0.090443	9.32628	3131.2	1.97983
LTR32+RAL(4.5E-5):4	5	0.102757	7.06735	3078.8	1.02876
LTR32+RAL(4.5E-5):5	5	0.0890408	13.1483	3120.6	0.839093
LTR32+RAL(1E-4):1	5	0.100086	4.8793	3230.2	1.23007
LTR32+RAL(1E-4):2	5	0.0941229	7.47799	3240.6	0.490388
LTR32+RAL(1E-4):3	5	0.0860381	7.68904	3232.8	1.1915
LTR32+RAL(1E-4):4	5	0.103016	8.54584	3315.8	0.544695
LTR32+RAL(1E-4):5	5	0.102492	10.0815	3202.4	0.301235
