# Supplementary material for: Spectrometric and computational studies of the binding of HIV-1 integrase inhibitors to viral DNA extremities
Source: PeerJ journal article supplement (doi:10.7717/peerj-pchem.6), 2019-12-02
Supplement: LTR32RAL1916.xls [file LTR32RAL1916.xls]

## Sheet: RAL1916
BLANK:3	5	0.00292883	971.939	443.8	4.66236
BLANK:9	5	0.0019114	1097.36	469.8	4.3744
BLANK:10	5	0.00489044	182.044	474.2	3.45125
LTR32(8nM):1	5	0.0641949	9.24543	3163.2	0.721981
LTR32(8nM):2	5	0.0682043	7.81388	3193.6	1.39358
LTR32(8nM):3	5	0.0668643	11.3633	3265.8	0.583959
LTR32(8nM):4	5	0.0713502	11.1904	3240.4	1.28631
LTR32(8nM):5	5	0.0670584	15.7484	3207.2	0.806865
LTR32(8nM):6	5	0.0737321	3.8422	3252.2	0.499849
LTR32(8nM):7	5	0.0590203	11.6185	3249.6	0.780774
LTR32(8nM):8	5	0.061314	16.1529	3234.8	0.591497
LTR32(8nM):9	5	0.0725784	9.14976	3261	1.25479
LTR32(8nM):10	5	0.0691147	5.59826	3276	1.33319
LTR32(8nM):11	5	0.0647226	5.01514	3271.4	0.592309
LTR32(8nM):12	5	0.0697399	12.5678	3263.6	1.16143
LTR32(8nM):13	5	0.0591993	10.9063	3258.2	1.31261
LTR32(8nM):14	5	0.0761685	4.34111	3273.6	1.17242
LTR32(8nM):15	5	0.0684059	8.69428	3230.6	1.05018
BLANK:3	5	0.0114984	134.717	473	1.0613
LTR32+RAL(6.24E-13):1	5	0.0744991	10.7837	3402.2	1.63946
LTR32+RAL(6.24E-13):2	5	0.0742823	10.3679	3405.8	0.875864
LTR32+RAL(6.24E-13):3	5	0.0678209	7.11273	3320.8	0.903768
LTR32+RAL(6.24E-13):4	5	0.0692533	5.0885	3408.2	0.429061
LTR32+RAL(6.24E-13):5	5	0.0707015	11.5883	3432	0.497476
LTR32+RAL(6.24E-13):6	5	0.0666681	8.95292	3368.6	1.17402
LTR32+RAL(6.24E-13):7	5	0.0749699	4.15574	3410.8	1.3537
BLANK:1	5	0.0120501	94.4719	564	2.15628
LTR32+RAL(1.24E-12):1	5	0.0525796	10.0091	3318	0.663529
LTR32+RAL(1.24E-12):2	5	0.081361	6.45424	3297.2	1.27133
LTR32+RAL(1.24E-12):3	5	0.0697427	4.55236	3295.2	1.06589
LTR32+RAL(1.24E-12):4	5	0.0544584	6.23196	3447	1.11806
LTR32+RAL(1.24E-12):5	5	0.0778957	8.55039	3365.8	1.24821
LTR32+RAL(1.24E-12):6	5	0.0742094	6.8706	3432	0.468109
LTR32+RAL(1.24E-12):7	5	0.0594829	17.7897	3408.6	0.854856
BLANK:3	5	0.00825882	294.264	779	2.17396
LTR32+RAL(2.5E-12):1	5	0.0690437	8.56316	3278.8	0.802905
LTR32+RAL(2.5E-12):2	5	0.0491613	22.5476	3292.8	1.11312
LTR32+RAL(2.5E-12):3	5	0.067982	17.9221	3305	1.1459
LTR32+RAL(2.5E-12):4	5	0.0641958	4.66861	3392.2	0.886757
LTR32+RAL(2.5E-12):5	5	0.0540482	8.36005	3257.8	1.47933
LTR32+RAL(2.5E-12):6	5	0.0571123	16.781	3314.2	1.81445
LTR32+RAL(2.5E-12):7	1	0.0799185	0	3419	0
LTR32+RAL(2.5E-12):8	5	0.066172	3.85773	3310.4	1.55142
LTR32+RAL(2.5E-12):9	5	0.0633629	14.0633	3323	0.875296
BLANK:1	5	0.0290578	54.3051	800.4	2.67279
BLANK:2	5	0.00645957	165.25	812.2	4.52454
LTR32+RAL(5E-12):1	5	0.0730817	12.8487	3205.2	0.724778
LTR32+RAL(5E-12):2	5	0.0559202	12.3851	3342.8	0.797784
LTR32+RAL(5E-12):3	5	0.0617807	16.6195	3345	1.10424
LTR32+RAL(5E-12):4	1	0.0816841	0	3201.8	0
LTR32+RAL(5E-12):5	5	0.0650437	8.22843	3408.2	0.818745
LTR32+RAL(5E-12):6	5	0.0642309	12.6125	3428.2	1.10928
LTR32+RAL(5E-12):7	5	0.0623852	13.9026	3303.6	1.5256
LTR32+RAL(5E-12):8	5	0.0754291	19.1511	3280.6	1.28045
LTR32+RAL(5E-12):9	5	0.0671305	5.57817	3341.6	2.10379
BLANK:3	5	0.0114582	136.558	930	4.48053
LTR32+RAL(7E-12):1	5	0.0615606	15.1997	3207.2	1.66424
LTR32+RAL(7E-12):2	1	0.0757575	0	3170	0
LTR32+RAL(7E-12):3	5	0.0653448	12.3232	3177	1.06495
LTR32+RAL(7E-12):4	5	0.0654705	8.78627	3218.4	1.52928
LTR32+RAL(7E-12):5	5	0.0552321	10.6844	3257.2	1.29155
LTR32+RAL(7E-12):6	5	0.0644362	12.9041	3370.2	1.16045
LTR32+RAL(7E-12):7	5	0.0568531	17.4186	3258.6	1.03093
BLANK:1	5	0.00642919	369.885	993	2.88604
LTR32+RAL(1E-11):1	5	0.0785189	14.8391	3306	1.91413
LTR32+RAL(1E-11):2	5	0.0611682	6.09737	3276	1.04701
LTR32+RAL(1E-11):3	5	0.0544076	15.4594	3298.4	1.92749
LTR32+RAL(1E-11):4	5	0.0579514	16.4837	3277.4	1.28185
LTR32+RAL(1E-11):5	5	0.0600297	17.7972	3342.2	0.733959
LTR32+RAL(1E-11):6	1	0.0804474	0	3445	0
LTR32+RAL(1E-11):7	5	0.0734757	6.63056	3421.8	0.641167
LTR32+RAL(1E-11):8	5	0.0781032	6.01532	3371.6	1.91286
BLANK:2	5	0.0147676	51.362	1132.4	4.25921
LTR32+RAL(5.65E-11):1	5	0.0614537	17.1066	3272.8	0.659547
LTR32+RAL(5.65E-11):2	5	0.0567785	16.8507	3224.4	1.57301
LTR32+RAL(5.65E-11):3	5	0.0505658	29.5772	3286	1.30136
LTR32+RAL(5.65E-11):4	5	0.0548563	14.7619	3305.6	0.675975
LTR32+RAL(5.65E-11):5	5	0.0635014	8.42494	3225.8	1.67542
LTR32+RAL(5.65E-11):6	5	0.05444	31.0298	3331.2	1.68195
LTR32+RAL(5.65E-11):7	5	0.0590432	7.98278	3245.2	1.42391
LTR32+RAL(5.65E-11):8	5	0.0633748	14.9681	3210	1.42755
LTR32+RAL(5.6E-11):1	5	0.0780967	5.63651	2462.4	1.81455
LTR32+RAL(5.6E-11):2	5	0.0847593	9.37008	2398.8	1.22815
LTR32+RAL(5.6E-11):3	5	0.0735688	9.97133	2519.6	1.2048
LTR32+RAL(5.6E-11):4	5	0.0733873	9.78969	2507.4	1.27992
BLANK:1	5	0.0109631	72.6462	1185.6	3.1818
LTR32+RAL(1E-10):1	5	0.0666917	17.0289	2490	2.08957
LTR32+RAL(1E-10):2	5	0.0693937	10.9092	2480.6	1.09569
LTR32+RAL(1E-10):3	5	0.0686793	4.5259	2531.2	2.15443
LTR32+RAL(1E-10):4	5	0.0749145	13.1922	2534.8	1.61694
LTR32+RAL(1E-10):5	5	0.067533	7.55401	2509.6	1.05473
LTR32+RAL(1E-10):6	5	0.087438	10.4124	2557.2	1.12644
BLANK:1	5	0.0102898	105.985	1220.2	2.16013
LTR32+RAL(5.37E-10):1	5	0.0598358	6.2515	2497.2	1.40777
LTR32+RAL(5.37E-10):2	5	0.0681357	21.306	2554.2	1.6245
LTR32+RAL(5.37E-10):3	5	0.0800357	14.3016	2535.8	1.05167
LTR32+RAL(5.37E-10):4	5	0.0591209	20.8679	2514.2	1.80881
LTR32+RAL(5.37E-10):5	5	0.0698502	8.50874	2485.8	0.923943
LTR32+RAL(5.37E-10):6	5	0.0688726	22.8379	2618.8	1.89028
BLANK:3	5	0.00343039	56.3901	1303.4	2.28068
LTR32+RAL(1E-9):1	5	0.0788395	13.8667	2456.6	0.644272
LTR32+RAL(1E-9):2	5	0.0819828	3.81395	2497.8	2.34028
LTR32+RAL(1E-9):4	5	0.0678687	9.07635	2465	1.39477
LTR32+RAL(1E-9):6	5	0.0759503	8.03	2508.6	2.02196
LTR32+RAL(1E-9):7	2	0.0866608	3.82194	2496.6	1.28174
LTR32+RAL(1E-9):8	5	0.0718078	20.2644	2522.4	1.47377
LTR32+RAL(1E-9):9	5	0.0725249	9.56489	2432.6	1.78682
LTR32+RAL(1E-9):10	5	0.0682401	10.2913	2513.2	1.20771
LTR32+RAL(1E-9):11	5	0.0786224	9.39948	2514.2	1.58142
LTR32+RAL(1E-9):12	5	0.0626112	2.30858	2560.4	1.58659
LTR32+RAL(1E-9):13	2	0.0922951	38.3347	2894.6	1.52007
LTR32+RAL(1E-9):14	5	0.0879788	22.6498	2667.2	1.55919
LTR32+RAL(1E-9):15	5	0.0645342	18.6522	2597.6	1.99112
BLANK:1	5	0.00938672	114.056	1513	2.35882
LTR32+RAL(5E-9):1	5	0.0760525	13.4419	2581.4	1.69977
LTR32+RAL(5E-9):2	5	0.0614491	11.1	2520.4	1.17783
LTR32+RAL(5E-9):3	5	0.0691207	8.15467	2482.4	2.68503
LTR32+RAL(5E-9):4	5	0.0592628	13.4868	2480.6	1.08707
LTR32+RAL(5E-9):5	5	0.0625777	13.6687	2574.6	1.14226
LTR32+RAL(5E-9):6	5	0.0736614	12.267	2549.2	1.96983
BLANK:1	5	0.0146207	78.8988	1507	2.11011
LT32+RAL(1.24E-8):1	5	0.0685707	11.8118	2617.2	1.77296
LT32+RAL(1.24E-8):2	5	0.0705911	20.1328	2558.6	1.07978
LTR32+RAL(1.24E-8):1	5	0.0628613	20.9158	4173.6	1.34191
LTR32+RAL(1.24E-8):2	5	0.0941901	7.47108	2648.8	2.1657
LTR32+RAL(1.24E-8):3	5	0.089873	12.1835	2580.8	1.7061
LTR32+RAL(1.24E-8):4	5	0.0693762	16.3011	2541.6	0.802162
LTR32+RAL(1.24E-8):5	5	0.0733007	17.1048	2675.2	2.01454
LTR32+RAL(1.24E-8):6	5	0.0697964	9.93302	2639.6	1.10663
LTR32+RAL(1.24E-8):7	5	0.0642225	9.44585	2651	2.13706
LTR32+RAL(6.14E-8):1	5	0.0596244	15.6614	3070	0.598232
LTR32+RAL(6.14E-8):2	5	0.0576433	11.049	2668.4	2.20984
LTR32+RAL(6.14E-8):3	5	0.0623869	22.903	3239.8	1.84481
LTR32+RAL(6.14E-8):4	5	0.0589798	10.0218	3108.6	0.819617
LTR32+RAL(6.14E-8):5	5	0.0770641	5.33381	3110.6	1.38754
LTR32+RAL(6.14E-8):6	1	0.0947596	0	3406	0
LTR32+RAL(6.14E-8):7	5	0.0983297	5.54427	3095.2	0.684474
LTR32+RAL(6.14E-8):8	5	0.0734774	20.2107	3279.6	3.92038
LTR32+RAL(6.14E-8):9	5	0.0775711	5.1893	3195.2	0.328752
LTR32+RAL(1E-7):1	5	0.0609735	9.88778	3277.6	0.94476
LTR32+RAL(1E-7):2	5	0.0624731	10.3043	3207.8	1.75486
LTR32+RAL(1E-7):3	5	0.0864487	15.4466	3234.8	1.07068
LTR32+RAL(1E-7):4	5	0.0485952	11.0371	3281.6	1.37732
LTR32+RAL(1E-7):5	5	0.0679292	9.13594	3330.4	0.941586
LTR32+RAL(1E-7):6	5	0.0684103	12.0487	3237.4	0.567265
LTR32+RAL(1E-7):7	5	0.0629561	6.36836	3346	0.888185
LTR32+RAL(6E-7):1	5	0.0719259	13.1125	3513.8	1.00889
LTR32+RAL(6E-7):2	5	0.0754353	13.317	3435.6	1.22929
LTR32+RAL(6E-7):3	5	0.0655642	19.9945	3331.8	0.968353
LTR32+RAL(6E-7):4	1	0.088414	0	3531	0
LTR32+RAL(6E-7):5	5	0.0642093	15.7196	3512.8	1.13003
LTR32+RAL(6E-7):6	5	0.0687032	12.5068	3535.4	0.781085
LTR32+RAL(6E-7):7	5	0.0632451	9.28284	3435.6	1.27167
LTR32+RAL(6E-7):8	3	0.0955106	28.5366	3334.67	2.19086
LTR32+RAL(6E-7):9	5	0.0633484	14.9704	3465.2	1.22427
LTR32+RAL(6E-7):10	5	0.0741163	13.1606	3424.8	1.56221
LTR32+RAL(1E-6):1	5	0.0777868	6.2875	3354.6	1.18073
LTR32+RAL(1E-6):2	5	0.0695665	23.859	3477.8	2.79545
LTR32+RAL(1E-6):3	5	0.0745944	10.4877	3444	1.33038
LTR32+RAL(1E-6):4	5	0.0627955	12.0051	3382.6	1.42209
LTR32+RAL(1E-6):5	5	0.0635616	14.2255	3314.2	0.411552
LTR32+RAL(1E-6):6	5	0.0563251	17.5239	3402.6	0.815181
LTR32+RAL(1E-6):7	1	0.0859361	0	3501	0
LTR32+RAL(1E-6):8	5	0.057209	20.0095	3429	1.33619
LTR32+RAL(1E-6):9	5	0.0653651	12.1341	3421.2	2.09499
LTR32+RAL(5E-6):1	5	0.0673255	7.7129	3587.2	0.876878
LTR32+RAL(5E-6):2	5	0.0649236	9.95572	3449	0.93061
LTR32+RAL(5E-6):3	5	0.0633819	6.82925	3568.8	1.38928
LTR32+RAL(5E-6):4	5	0.0670826	3.35781	3574.8	0.82834
LTR32+RAL(4.5E-5):1	5	0.0790194	9.40653	3649.2	1.30012
LTR32+RAL(4.5E-5):2	1	0.098076	0	3714	0
LTR32+RAL(4.5E-5):3	5	0.064605	5.16509	3723.4	0.682119
LTR32+RAL(4.5E-5):4	5	0.0640633	5.29612	3724	0.922934
LTR32+RAL(4.5E-5):5	5	0.0665391	10.364	3655.4	1.01333
LTR32+RAL(4.5E-5):6	5	0.0750993	10.8463	3671	0.898277
LTR32+RAL(4.5E-5):7	5	0.0700452	5.56176	3669	0.880648
LTR32+RAL(4.5E-5):8	5	0.0583842	17.4935	3682	1.06202
LTR32+RAL(4.5E-5):9	1	0.0933617	0	3647	0
LTR32+RAL(4.5E-5):10	5	0.0733812	4.93637	3696.8	0.863811
LTR32+RAL(4.5E-5):11	5	0.0761132	3.56261	3762.6	0.672812
LTR32+RAL(4.5E-5):12	5	0.0512256	12.1468	3712	1.0016
LTR32+RAL(4.5E-5):13	1	0.0904976	0	3571	0
LTR32+RAL(4.5E-5):14	5	0.0746907	7.72917	3741.8	1.04739
LTR32+RAL(1E-4):1	5	0.0691817	18.5335	3897.6	1.19718
LTR32+RAL(1E-4):2	5	0.078527	12.1943	3764	1.21443
LTR32+RAL(1E-4):3	5	0.05846	17.1644	3794.2	1.33019
LTR32+RAL(1E-4):4	5	0.068261	7.04381	3868.2	0.312625
LTR32+RAL(1E-4):5	5	0.078321	4.97454	3925.2	1.62703
LTR32+RAL(1E-4):6	5	0.0667353	9.68686	3965	0.966581
LTR32+RAL(1E-4):7	5	0.074115	14.1054	4023.8	1.28698
LTR32+RAL(1E-4):8	5	0.0574818	10.4076	3912	1.41272
LTR32+RAL(1E-4):9	5	0.064806	22.0254	3989.2	0.768045
LTR32+RAL(1E-4):10	5	0.063715	5.51728	3922	0.754433
LTR32+RAL(1E-4):11	5	0.0792785	13.58	3993.4	1.60477
LTR32+RAL(1E-4):12	5	0.0673522	5.79702	4082.6	1.44247
LTR32+RAL(1E-4):13	5	0.0554162	15.6094	3842.2	1.89477
