# Supplementary material for: Spectrometric and computational studies of the binding of HIV-1 integrase inhibitors to viral DNA extremities
Source: PeerJ journal article supplement (doi:10.7717/peerj-pchem.6), 2019-12-02
Supplement: SIII-oct02.docx [file SIII-oct02.docx]

**S.III.** Titration curves of DTG-LTR32 at A) 5oC, B) 15oC and C) 25oC

**A.**


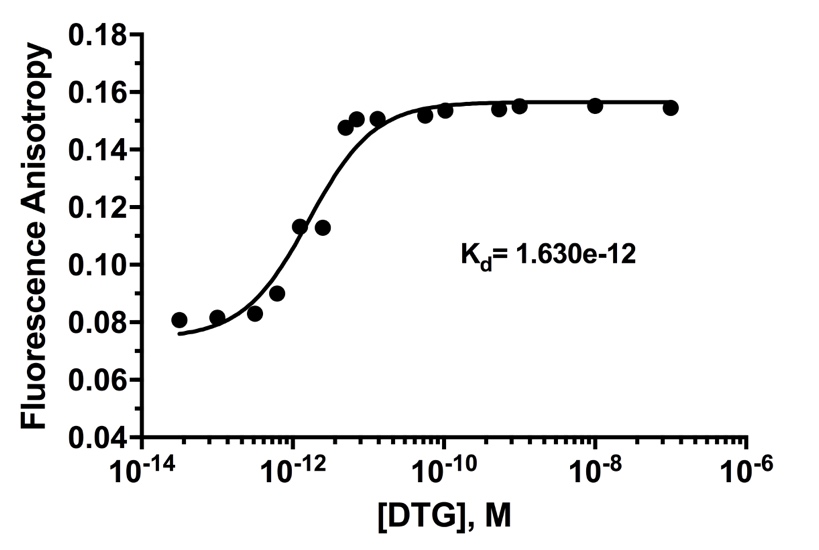


**S.III.A.** This titration curve was reported in El Khoury et al. [32] and was added to this study for completeness sake. Titration curve of LTR32 at 8 nM by increasing concentrations of DTG (from 10 -13 to 10 -6) at 5oC. Values of Kd yielded by treatment of the DTG-LTR32 titration curve is inserted on the graph.

**B.**


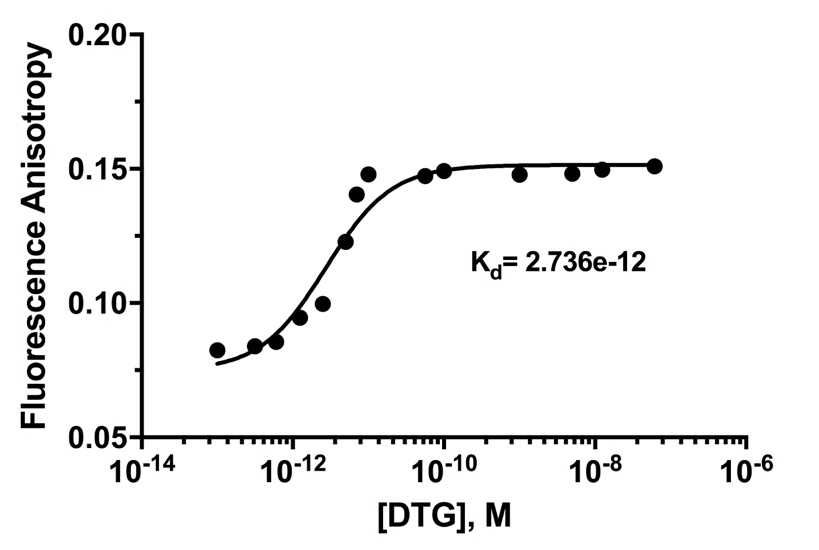


**S.III.B.** Titration curve of LTR32 at 8 nM by increasing concentrations of DTG (from 10 -13 to 10 -6) at 15oC. Values of Kd yielded by treatment of the DTG-LTR32 titration curve is inserted on the graph.

**C.**


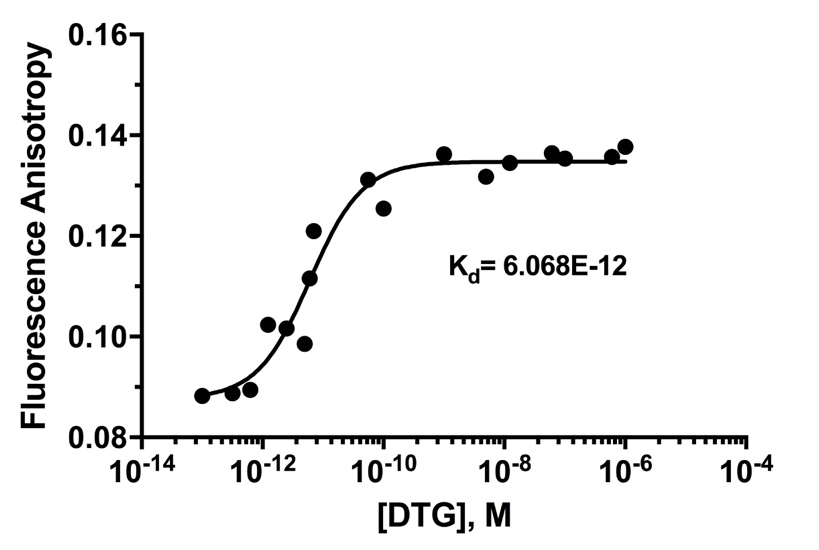


**S.III.C.** Titration curve of LTR32 at 8 nM by increasing concentrations of DTG (from 10 -13 to 10 -6) at 25oC. Values of Kd yielded by treatment of the DTG-LTR32 titration curve is inserted on the graph.
